# Supplementary material for: Selective nitrogen bonding states in nitrogen-doped carbon via a solution plasma process for advanced oxygen reduction reaction
Source: Royal Society of Chemistry journal article supplement (doi:10.1039/c6ra24546c), 2016-01-01
Supplement: c6ra24546c1.pdf [file c6ra24546c1.pdf]

### Supplementary Information

Table S1: Atomic percentage of AN and PZ from the EDS mapping

| Sample | C (at. %) | N (at. %) | O (at. %) | W (at. %) |
|--------|-----------|-----------|-----------|-----------|
| AN     | 85.43     | 3.14      | 11.17     | 0.26      |
| PZ     | 83.24     | 6.94      | 9.35      | 0.47      |

Table S2: Surface composition of AN and PZ from the XPS spectra

| Sample | C (at. %) | N (at. %) | O (at. %) | W (at. %) |
|--------|-----------|-----------|-----------|-----------|
| AN     | 77.1      | 2.6       | 19.9      | 0.4       |
| PZ     | 79.8      | 7.5       | 12.0      | 0.7       |

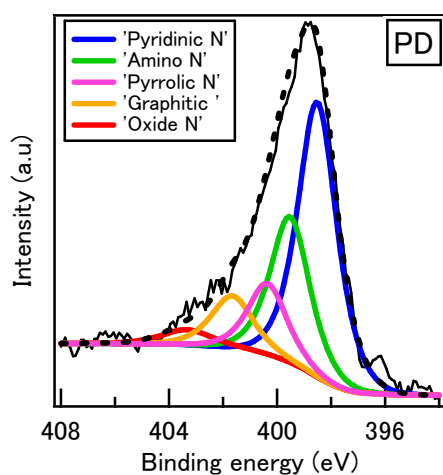

Fig. S1. High resolution N 1s spectra with peak deconvolution of Pyridine (PD)

Table S3: Bonding states of carbon in pyridine (PD) from detailed deconvolution of XPS N1s spectra.  
 (The results were compared to AN and PZ from Table 3 as reference.)

| Bonding                | Peak Position<br>(eV) | Relative percentage (%) |      |      |
|------------------------|-----------------------|-------------------------|------|------|
|                        |                       | Pyridine (PD)           | AN   | PZ   |
| Pyridinic              | 398.4 – 398.6         | 47.9                    | 37.9 | 56.0 |
| Amino                  | 399.5                 | 22.6                    | 34.9 | 19.9 |
| Pyrrolic               | 400.1 - 400.3         | 12.4                    | 8.5  | 13.5 |
| Quaternary<br>(center) | 401.1 – 401.5         | 8.4                     | 12.8 | 8.1  |
| Quaternary<br>(valley) | 402.                  | 3.6                     | 5.74 | 2.0  |
| Oxide                  | 403.8 – 404.1         | 5.0                     | --   | 1.39 |

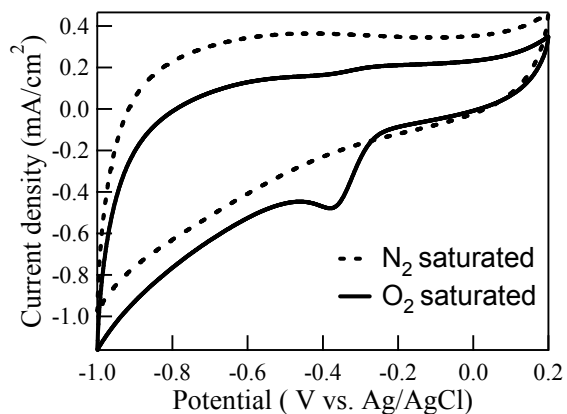

Fig. S2. CV curves of carbon samples synthesized by pyridine (PD) under N<sub>2</sub> (dotted) and O<sub>2</sub> (solid) saturated 0.1M KOH solution at a scan rate of 50 mV s<sup>-1</sup>.

Table S4. Summarized data for the relative percentage of pyridinic-N, amino-N, quaternary-N, normalized current and ORR onset potential for Fig. 7a and b.

|    | Amino (%) | Pyridinic (%) | Quaternary center (%) | Quaternary valley (%) | Normalized Current (mA/cm <sup>2</sup> ) | ORR onset potential (V vs Ag/AgCl) |
|----|-----------|---------------|-----------------------|-----------------------|------------------------------------------|------------------------------------|
| AN | 34        | 33.3          | 12.8                  | 5.74                  | 0.4                                      | -0.23                              |
| PZ | 65.6      | 18.4          | 8.1                   | 2                     | 0.73                                     | -0.27                              |
| PD | 47.9      | 22.6          | 8.4                   | 3.6                   | 0.53                                     | -0.24                              |

\*The current density has been normalized based on total surface area.
